# Supplementary material for: Deep-learning-based sub-seasonal precipitation and streamflow ensemble forecasting over the source region of the Yangtze River
Source: Copernicus journal article supplement (doi:10.5194/hess-29-2023-2025), 2025-04-22
Supplement: Supplementary file 1 [file hess-29-2023-2025-supplement.pdf]

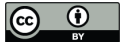

*Supplement of*

## **Deep-learning-based sub-seasonal precipitation and streamflow ensemble forecasting over the source region of the Yangtze River**

**Ningpeng Dong et al.**

*Correspondence to:* Ningpeng Dong (dongnp@iwhr.com) and Haoran Hao (1020205041@tju.edu.cn)

The copyright of individual parts of the supplement might differ from the article licence.

## S1. Evaluation of temperature forecasts

By applying the delta method to the raw ECMWF forecasts, the mean absolute bias of temperature forecasts can be reduced by 0.49°C averaged over all lead times. In particular, delta improves the forecasts more remarkably (by 0.93°C and 0.67°C) for lead times of 1-5 days and 6-10 days, suggesting that delta method is able to effectively reduce the bias of sub-seasonal ECMWF temperature forecasts.

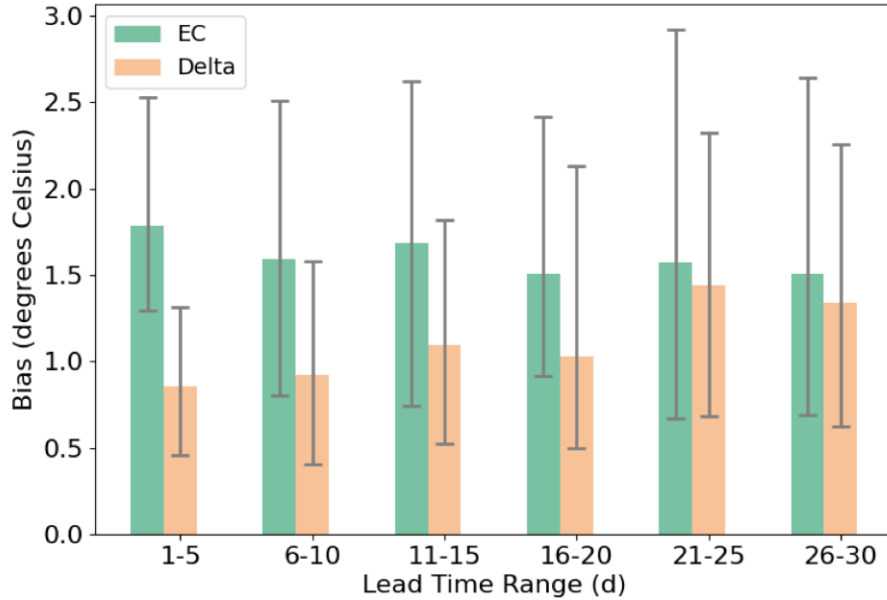

**Figure S1.** The mean absolute bias of temperature forecasts across lead times of 1-30 days. Error bar represents the 25th-75th percentile interval.

**Table S1.** The hyperparameters in loss function of CNNs

| Lead time  | <i>a</i> | <i>b</i> |
|------------|----------|----------|
| 0~7 days   | 2        | 0.4      |
| 8~15 days  | 2        | 0.8      |
| 16~23 days | 2        | 1.5      |
| 24-30 days | 2        | 2        |

**Table S2.** The hyperparameters of hybrid hydrologic model

| Hyperparameters     | Value             | Descriptions                              |
|---------------------|-------------------|-------------------------------------------|
| Learning_rate       | Epoch 0-30: 1e-2  | Learning rate                             |
|                     | Epoch 31-40: 5e-3 |                                           |
|                     | Epoch 41-50: 1e-3 |                                           |
| Output_dropout      | 0.22              | Dropout applied to the output of the LSTM |
| Seq_length          | 177               | Length of input sequence                  |
| Hidden_size         | 21                | Number of neurons in the hidden layer     |
| initial_forget_bias | 3                 | Initial value of the forget gate bias     |
